# Supplementary material
Source: PubMed Central journal article supplement (PMC5861495)
Supplement: NIHMS945830-supplement-Appendix_A.pdf [file NIHMS945830-supplement-Appendix_A.pdf]

## Appendix A – Overview of the Search of the Databases

### **Initial Search Performed May 2010**

Time period limit applied on all searches: 2000 – 2009

#### **Database (Platform)**

CINAHL, Full Database: 1981 - Present (EBSCOhost); Date Search Run: 12 May 2010  
Cochrane Library, Full Library (Cochrane/ John Wiley & Sons, Ltd); Date Search Run: 24 May 2010  
EMBASE, 1996 – 2010 Week 17 (OVID); Date Search Run: 5 May 2010  
MEDLINE, 1996 – April Week 3, 2010 (OVID); Date Search Run: 5 May 2010  
PsycINFO, 1987 – April Week 2, 2010 (OVID); Date Search Run: 5 May 2010  
Sociological Abstracts, Full Database: 1952 – Current (CSA/Proquest); Date Search Run: 12 May 2010

### **Search Update/Last Search performed May 2011**

Time period limit applied on all searches: 2009 -2010

#### **Database (Platform)**

CINAHL, Full Database: 1981 - Present (EBSCOhost); Date Search Run: 10 May 2011  
Cochrane Library, Full Library (Cochrane/ John Wiley & Sons, Ltd); Date Search Run: 10 May 2011  
EMBASE, 1996 – Week 18m 2011 (OVID); Date Search Run: 9 May 2011  
MEDLINE, 1948 – Week 4, 2011 (OVID); Date Search Run: 9 May 2011  
PsycINFO, 1987 – April Week 1, 2011 (OVID); Date Search Run: 9 May 2011  
Sociological Abstracts, Full Database: 1952 – Current (CSA/Proquest); Date Search Run: 10 May 2011

\*No other limits beyond years were applied to the search (i.e. no publication limits, no language limits, etc.)

## Appendix A – CINAHL Search Strategy – EBSCOhost Platform

MH = Major Heading      N4 = Near 4 words  
TI = Title                N2 = Near 2 words  
AB = Abstract            /pc=prevention and control  
\*= truncation            /ut= utilization

### Search Years:

2000-2009 (May 2010)

Update Search 2009-2010 (May 2011)

No Publication or Language Limits Applied

### HIV/AIDS/STD Index and Keywords

1. (MH "HIV Infections/PC") OR (MH "Acquired Immunodeficiency Syndrome/PC") OR (MH "Sexually Transmitted Diseases/PC") OR (MH "Sexually Transmitted Diseases, Bacterial") OR (MH "Sexually Transmitted Diseases, Viral") OR (MH "AIDS Serodiagnosis/UT") OR (MH "HIV Seropositivity")
2. TI (HIV infect\*) OR (living N2 HIV) OR (living N2 AIDS) OR (HIV positive\*) OR (HIV N2 prevent\*)
3. AB (HIV infect\*) OR (living N2 HIV) OR (living N2 AIDS) OR (HIV positive\*) OR (HIV N2 prevent\*)
4. 1 OR 2 OR 3

### Prevention/Intervention/ Index and Keywords

5. (MH "Preventive Health Care") OR (MH "Health Promotion") OR (MH "Program Evaluation") OR (MH "Clinical Trials") OR (MH "Evaluation Research") OR (MH "Contact Tracing") OR (MH "Case Management") OR (MH "Needle Exchange Programs") OR (MH "Experimental Studies") OR (MH "Prospective Studies") OR (MH "Multicenter Studies") OR (MH "Random Assignment")
6. TI control group OR control trial OR controlled trial OR rct OR rcts OR case management OR contact tracing OR counseling OR counselling OR detox OR detoxification OR education\* OR effect OR effects OR effective OR effectiveness OR efficacy OR evaluation\* OR impact\* OR intervention\* OR needle exchange\* OR network\* OR outreach\* OR partner notification OR prevention\* OR program\* OR random\* OR

- rehab\* OR skill\* OR syringe exchange\* OR methadone OR test\* OR training OR trial\*
7. AB control group OR control trial OR controlled trial OR rct OR rcts OR case management OR contact tracing OR counseling OR counselling OR detox OR detoxification OR education\* OR effect OR effects OR effective OR effectiveness OR efficacy OR evaluation\* OR impact\* OR intervention\* OR needle exchange\* OR network\* OR outreach\* OR partner notification OR prevention\* OR program\* OR random\* OR rehab\* OR skill\* OR syringe exchange\* OR methadone OR test\* OR training OR trial\*
8. TI (drug\* N4 treatment\*) OR (partner\* N4 contact\* N4 referral\*) OR (notif\* N4 partner\*)
9. AB (drug\* N4 treatment\*) OR (partner\* N4 contact\* N4 referral\*) OR (notif\* N4 partner\*)
10. 5 OR 6 OR 7 OR 8 OR 9
11. 4 AND 10

### Systematic Reviews and Meta-Analysis

12. (MH "Meta Analysis")
13. TX systematic review OR meta-anal\* OR meta anal\* OR metaanal\* OR meta-analys\* OR meta analys\* OR metaanlys\* OR (systematic\* N4 review\*) OR (systematic\* N4 overview\*) OR (systematic\* N4 synthesis\*) OR (qualitativ\* N4 review\*) OR (qualitativ\* N4 overview\*) OR (qualitativ\* N4 synthesis\*) OR (quantitativ\* N4 review\*) OR (quantitativ\* N4 overview\*) OR (quantitativ\* N4 synthesis\*) OR (methodolog\* N4 review\*) OR (methodolog\* N4 overview\*) OR (methodolog\* N4 synthesis\*) OR meta-analytic OR meta analytic OR metaanalytic OR (integrative research review\*) OR (research integration)
14. TX MEDLINE OR MEDLARS OR EMBASE OR PubMed OR Sociological Abstracts OR Sociofile OR Psychinfo OR PyscINFO OR Psychlit OR Psyclit OR CINAHL OR (hand N2 search\*) OR (manual\* N2 search\*) OR electronic database\* OR bibliographic database\* OR computerized database\* OR computerized database\* OR online database\*
15. 12 OR 13 OR 14
16. 11 and 15

Appendix A – Cochrane Database of Systematic Reviews- John Wiley & Sons, Ltd

“HIV Infections OR Acquired Immunodeficiency Syndrome OR Sexually Transmitted Diseases OR Sexually Transmitted Diseases” (in Title, Abstract, or Keywords) AND “Prevention OR Intervention OR Interventions in (Title, Abstract, or Keywords) in Cochrane Database of Systematic Reviews

Search Years:

2000-2009 (May 2010)

Update Search 2009-2010 (May 2011)

No Publication or Language Limits Applied

## Appendix A – EMBASE Search Strategy – OVID Platform

\$ = truncation                / = Subject Heading  
ab = abstract                /pc = subheading  
tw = text word                ? = alternate spelling  
adj2 = Adjacent 2 words  
adj4 = Adjacent 4 words

### Search Years:

2000-2009 (May 2010)

Update Search 2009-2010 (May 2011)

No Publication or Language Limits Applied

### HIV/AIDS/STD Emtree (Index) and Keywords

1. HIV Infection/pc (prevention and control)
2. AIDS/pc
3. sexually transmitted diseases/pc
4. HIV infect\$.ti,ab
5. (living adj2 HIV).ti,ab
6. (living adj2 (AIDS not hearing)).ti,ab
7. HIV positive\$.ti,ab
8. (HIV adj2 prevent\$).ti,ab
  
9. or/1-8

### PREVENTION/INTERVENTION/EVALUATION/EDUCATION INDEXING TERMS AND KEYWORDS

10. Primary Prevention/
11. Preventive Health Service/
12. Health Promotion/
13. Health Care Quality/
14. Patient Care/
15. Randomized Controlled Trials/
16. Evaluation/
17. Contact Examination/
18. Types of Study/
19. Follow Up/
20. Longitudinal Study/
21. Multicenter Study/
22. Randomization/
23. control group.ti,ab
24. control trial.ti,ab
25. controlled trial.ti,ab
26. (rct or rcts).ti,ab
27. case management.ti,ab
28. contact tracing.ti,ab
29. (counseling or counselling).ti,ab
30. (detox or detoxification).ti,ab
31. (drug\$ adj4 treatment\$).ti,ab
32. education\$.ti,ab

33. (effect or effects or effective or effectiveness).ti,ab
34. efficacy.ti,ab
35. evaluation\$.ti,ab
36. impact\$.ti,ab
37. intervention\$.ti,ab
38. needle exchange\$.ti,ab
39. network\$.ti,ab
40. outreach\$.ti,ab
41. partner notification.ti,ab
42. (partner\$ adj4 contact\$ adj4 referral\$).ti,ab
43. (notif\$ adj4 partner\$).ti,ab
44. prevention\$.ti,ab
45. program\$.ti,ab
46. random\$.ti,ab
47. rehab\$.ti,ab
48. skill\$.ti,ab
49. syringe exchange\$.ti,ab
50. methadone.ti,ab
51. test\$.ti,ab
52. training.ti,ab
53. trial\$.ti,ab
  
54. or/10-53

### BEHAVIOR/OUTCOMES INDEXING TERMS AND KEYWORDS

55. meta-analysis/
56. systematic review.tw,sh
57. (meta-anal\$ or meta anal\$ or metaanal\$ or meta-analys\$ or meta analys\$ or metaanalys\$).tw,sh
58. (meta-analytic or meta analytic or metaanalytic).tw,sh
59. (systematic\$ adj4 review\$).tw,sh
60. (systematic\$ adj4 overview\$).tw,sh
61. (systematic\$ adj4 synthesis\$).tw,sh
62. (qualitativ\$ adj4 review\$).tw,sh
63. (qualitativ\$ adj4 overview\$).tw,sh
64. (qualitativ\$ adj4 synthesis\$).tw,sh
65. (quantitativ\$ adj4 review\$).tw,sh
66. (quantitativ\$ adj4 overview\$).tw,sh
67. (quantitativ\$ adj4 synthesis\$).tw,sh
68. (methodolog\$ adj4 review\$).tw,sh
69. (methodolog\$ adj4 overview\$).tw,sh
70. (methodolog\$ adj4 synthesis\$).tw,sh
71. (integrative research review\$ or research integration).tw,sh
72. "review"/
73. (MEDLINE OR MEDLARS OR EMBASE OR PubMed)

74. (sociological abstracts or sociofile or psychinfo or psycinfo)
75. (psychlit OR psyclit)
76. CINAHL.tw,sh
77. ((hand adj2 search\$) OR (manual\$ adj2 search\$)).tw,sh
78. (electronic database\$ or bibliographic database\$ or computerized database\$ or online database\$).tw,sh
79. OR/73-78
80. 72 and 79
81. OR/55-71
82. 80 OR 81
83. 9 and 54 and 82

## Appendix A – MEDLINE Search Strategy – OVID Platform

\$ = truncation /pc or/ut= subheading  
ab = abstract ti = Title  
/ = Subject Heading tw = text word  
adj2 = Adjacent 2 words adj4= Adjacent 4 words

### Search Years:

2000-2009 (May 2010)

Update Search 2009-2010 (May 2011)

No Publication or Language Limits Applied

### HIV/AIDS/STD MeSH and Keywords

1. HIV infections/pc (prevention and control)
2. Acquired Immunodeficiency Syndrome/pc
3. Sexually transmitted diseases/pc
4. Sexually transmitted diseases, bacterial
5. Sexually transmitted diseases, viral
6. AIDS serodiagnosis/ut (utilization)
7. HIV Seropositivity/
8. HIV infect\$.ti,ab
9. (living adj2 HIV).ti,ab
10. (living adj2 (AIDS not hearing)).ti,ab
11. HIV positive\$.ti,ab
12. (HIV adj2 prevent\$).ti,ab
13. OR/1-13

### PREVENTION/INTERVENTION/EVALUATION/EDUCATION MESH AND KEYWORDS

14. Primary Prevention/
15. Preventive Health Services/
16. Health Promotion/
17. Program Evaluation/
18. Randomized Controlled Trials/
19. Evaluation Studies/
20. Contact Tracing/
21. Case management/
22. Needle-Exchange Programs/
23. Intervention Studies/
24. Follow-Up Studies/
25. Longitudinal Studies/
26. Multicenter Studies/
27. Random Allocation/
28. control group.ti,ab
29. control trial.ti,ab
30. controlled trial.ti,ab
31. rct.ti,ab
32. rcts.ti,ab
33. case management.ti,ab

34. contact tracing.ti,ab
35. (counseling or counselling).ti,ab
36. (detox or detoxification).ti,ab
37. (drug\$ adj4 treatment\$).ti,ab
38. education\$.ti,ab
39. (effect or effects or effective or effectiveness).ti,ab
40. efficacy.ti,ab
41. evaluation\$.ti,ab
42. impact\$.ti,ab
43. intervention\$.ti,ab
44. needle exchange\$.ti,ab
45. network\$.ti,ab
46. outreach\$.ti,ab
47. partner notification.ti,ab
48. (partner\$ adj4 contact\$ adj4 referral\$).ti,ab
49. (notif\$ adj4 partner\$).ti,ab
50. prevention\$.ti,ab
51. program\$.ti,ab
52. random\$.ti,ab
53. rehab\$.ti,ab
54. skill\$.ti,ab
55. syringe exchange\$.ti,ab
56. methadone.ti,ab
57. test\$.ti,ab
58. training.ti,ab
59. trial\$.ti,ab
60. or/14-59

### Medline systematic review filter

61. systematic review.tw,sh
62. (meta-anal\$ or meta anal\$ or metaanal\$ or meta-analys\$ or meta analys\$ or metaanalys\$).tw,sh
63. meta-analysis.pt or meta-analysis/
64. (systematic\$ adj4 review\$).tw,sh.
65. (systematic\$ adj4 overview\$).tw,sh.
66. (systematic\$ adj4 synthesis\$).tw,sh
67. (qualitativ\$ adj4 review\$).tw,sh
68. (qualitativ\$ adj4 overview\$).tw,sh
69. (qualitativ\$ adj4 synthesis\$).tw,sh
70. (quantitativ\$ adj4 review\$).tw,sh.
71. (quantitativ\$ adj4 overview\$).tw,sh.
72. (quantitativ\$ adj4 synthesis\$).tw,sh.
73. (methodolog\$ adj4 review\$).tw,sh.
74. (methodolog\$ adj4 overview\$).tw,sh.
75. (methodolog\$ adj4 synthesis\$).tw,sh
76. (meta-analytic or meta analytic or metaanalytic).tw,sh
77. (integrative research review\$ or research integration).tw,sh

78. Review/
79. (medline or medlars or embase or  
pubmed).tw,sh.
80. (sociological abstracts or sociofile or psychinfo  
or psycinfo).tw,sh.
81. (psychlit or psyclit).tw,sh.
82. cinahl.tw,sh.
83. ((hand adj2 search\$) or (manual\$ adj2  
search\$)).tw,sh.
84. (electronic database\$ or bibliographic  
database\$ or computeri?ed database\$ or online  
database\$).tw,sh.
  
85. or/79-84
86. 85 and 78
87. OR/61-77
88. 86 OR 87
89. 13 AND 60 AND 88

Appendix A-PsycINFO Search Strategy– OVID Platform

\$ = truncation                      ab = abstract  
ti = title                              tw = text word  
/ = Subject Heading                .id = Key Concept  
Adj2= Adjacent 2 words  
Adj4= Adjacent 4 words

Search Years:  
2000-2009 (May 2010)  
Update Search 2009-2010 (May 2011)  
No Publication or Language Limits Applied

HIV/AIDS/STDS INDEXING TERMS

1. Human immunodeficiency virus/
2. Acquired Immune Deficiency Syndrome/
3. Sexually Transmitted Diseases/
4. HIV infect\$.ti,ab
5. (living adj2 HIV).ti,ab
6. (living adj2 (AIDS not hearing)).ti,ab
7. HIV positive\$.ti,ab
8. (HIV adj2 prevent\$).ti,ab
  
9. or/1-8

PREVENTION/INTERVENTION/EVALUATION/EDUCATION INDEXING TERMS AND KEYWORDS

10. Prevention/
11. HIV testing/
12. AIDS prevention/
13. Primary Health Care/
14. Case management/
15. Health Promotion/
16. Program Evaluation/
17. Needle-Exchange Programs/
18. Followup Studies/
19. Longitudinal Studies/
20. Random sampling/
21. control group.ti,ab
22. control trial.ti,ab
23. controlled trial.ti,ab
24. (rct or rcts).ti,ab
25. case management.ti,ab
26. contact tracing.ti,ab

27. (counseling or counselling).ti,ab
28. (detox or detoxification).ti,ab
29. (drug\$ adj4 treatment\$).ti,ab
30. education\$.ti,ab
31. (effect or effects or effective or effectiveness).ti,ab
32. efficacy.ti,ab
33. evaluation\$.ti,ab
34. impact\$.ti,ab
35. intervention\$.ti,ab
36. needle exchang\$.ti,ab
37. network\$.ti,ab
38. outreach\$.ti,ab
39. partner notification.ti,ab
40. (partner\$ adj4 contact\$ adj4 referral\$).ti,ab
41. (notif\$ adj4 partner\$).ti,ab
42. prevention\$.ti,ab
43. program\$.ti,ab
44. random\$.ti,ab
45. rehab\$.ti,ab
46. skill\$.ti,ab
47. syringe exchang\$.ti,ab
48. methadone.ti,ab
49. test\$.ti,ab
50. training.ti,ab
51. trial\$.ti,ab

52. or/10-51

53. 9 AND 52

SYSTEMATIC REVIEWS

54. Meta Analysis/
55. Meta analysis.id
56. (meta-anal\$ OR meta anal\$ OR metaanal\$).tw
57. (meta-analys\$ or meta analys\$ OR metaanalys\$).tw,sh
58. (meta-analytic\$ or meta analytic\$ or metaanalytic\$).tw,sh
59. (systematic review\$).tw,sh
60. (systematic\$ adj4 review\$).tw,sh
61. (systematic\$ adj4 overview\$).tw,sh
62. (systematic\$ adj4 synthesis\$).tw,sh
63. (qualitativ\$ adj4 review\$).tw,sh
64. (qualitativ\$ adj4 overview\$).tw,sh



65. (qualitativ\$ adj4 synthesis\$).tw,sh
66. (quantitativ\$ adj4 review\$).tw,sh
67. (quantitativ\$ adj4 overview\$).tw,sh
68. (quantitativ\$ adj4 synthesis\$).tw,sh
69. (methodolog\$ adj4 review\$).tw,sh
70. (methodolog\$ adj4 overview\$).tw,sh
71. (methodolog\$ adj4 synthesis\$).tw,sh
72. "Literature Review"/
73. (MEDLINE OR Medlars OR EMBASE OR PUBMED).tw,sh
74. (Sociological Abstracts OR Sociofile OR PsychINFO or PsyclINFO
75. (psychlit OR psyclit).tw,sh
76. CINAHL.tw,sh
77. ((hand adj2 search\$) OR (manual\$ adj2 search)).tw,sh
78. (electronic database\$ OR bibliographic database\$ or computeri?ed database\$ OR online database\$).tw,sh
79. OR/73-78
80. 72 AND 79
81. OR/54-71
82. 80 OR 81
83. 53 and 82

Appendix A – Sociological Abstracts Search Strategy-  
CSA Platform

DE = Index heading                      KW = Keyword  
 TI = Title                                    ? = Wildcard  
 AB = Abstract                                \* = truncation  
 “within 2” = words                        “within 4” = words

Search Years:

2000-2009 (May 2010)

Update Search 2009-2010 (May 2011)

No Publication or Language Limits Applied

(Note: This search was developed and run before the search platform overhaul of the CSA Platform)

1. ((DE= acquired immune deficiency syndrome OR DE= venereal diseases OR TI= HIV infect\* OR AB= HIV infect\* OR TI= (living within 2 HIV) OR AB= (living within 2 HIV) OR TI= (living within 2 (AIDS not hearing)) OR AB= (living within 2 (AIDS not hearing)) OR TI= HIV positive\* OR AB= HIV positive\* OR TI= (HIV within 2 prevent\*) OR AB= (HIV within 2 prevent\*)
  
2. ((DE= Primary Health care OR DE= Prevention OR DE= Health Care Services OR DE= Program Evaluation OR DE= Trials OR DE= Case management OR DE= Random Samples OR TI=control group OR AB=control group OR TI=control trial OR AB=control trial OR TI=controlled trial OR AB=controlled trial OR TI=rct OR AB=rct OR TI=rcts OR AB=rcts OR TI=case management OR AB=case management OR TI=contact tracing OR AB=contact tracing OR TI=(counseling or counselling) OR AB=(counseling or counseling) OR TI=(detox or detoxification) OR AB=(detox or detoxification) OR TI=(drug\* adj4 treatment\*) OR AB=(drug\* adj4 treatment\*) OR TI=education\* OR AB=education\* OR TI=(effect or effects or effective or effectiveness) OR AB=(effect or effects or effective or effectiveness) OR TI=efficacy OR AB=efficacy OR TI=evaluation\* OR AB=evaluation\* OR TI=impact\* OR AB=impact\* OR TI=intervention\* OR AB=intervention\* OR TI=needle exchange\* OR AB=needle exchange\* OR TI=network\* OR AB=network\* OR TI=outreach\* OR AB=outreach\* OR TI=partner OR notification OR AB=partner notification OR TI=(partner\* within 4 contact\* within 4 referral\*) OR AB=(partner\* within 4 contact\* within 4 referral\*) OR TI=(notif\* within 4 partner\*) OR AB=(notif\* within 4 partner\*) OR

TI=prevention\* OR AB=prevention\* OR  
 TI=program\* OR AB=program\* OR TI=random\*  
 OR AB=random\* OR TI=rehab\* OR AB=rehab OR  
 TI=skill\* OR AB-skill\* OR TI=syringe exchange\*  
 OR AB=syringe exchange\* OR TI=methadone OR  
 AB=methadone OR TI=test\* OR AB=test\* OR  
 TI=training OR AB=training OR TI=trial\* OR  
 AB=trial\*))

3. ((DE=Literature Reviews OR KW=(meta-anal\* OR meta anal\* OR metaanal\* OR meta-analys\* OR meta analys\* OR metaanalys\*) OR KW= systematic review OR KW=(meta-analytic OR meta analytic OR metaanalytic) OR KW=(systematic\* within 4 review\*) OR KW=(systematic\* within 4 overview\*) OR KW=(systematic\* within 4 synthesis\*) OR KW=(qualitativ\* within 4 review\*) OR KW=(qualitativ\* within 4 overview\*) OR KW=(qualitativ\* within 4 synthesis\*) OR KW=(quantitativ\* within 4 review\*) OR KW=(quantitativ\* within 4 overview\*) OR KW=(quantitativ\* within 4 synthesis\*) OR KW=(methodolog\* within 4 review\*) OR KW=(methodolog\* within 4 overview\*) OR KW=(methodolog\* within 4 synthesis\*) OR KW=(integrative research review\* OR research integration) OR KW=(MEDLINE OR MEDLARS OR EMBASE OR PUBMED) OR KW=(sociological abstracts OR sociofile OR psychinfo or psycINFO) OR KW=Psychlit OR psyclit OR KW=CINAHL OR KW=((hand within 2 search\*) OR (manual\* within 2 search\*)) OR KW=(electronic database\* OR bibliographic database\* OR computeri?ed database\* OR online database\*))
  
4. 1 AND 2 AND 3
