# Supplementary material
Source: PubMed Central journal article supplement (PMC5861495)
Supplement: NIHMS945830-supplement-Appendix_B.pdf [file NIHMS945830-supplement-Appendix_B.pdf]

## Appendix B: 102 Citations Included in the Review

- Albarracin D, Gillette JC, Earl AN, Glasman LR, Durantini MR, Ho MH. 2005. A test of major assumptions about behavior change: a comprehensive look at the effects of passive and active HIV-prevention interventions since the beginning of the epidemic. *Psychological Bulletin* **131**(6): 856-897.
- Albarracin J, Albarracin D, Durantini M. 2008. Effects of HIV-prevention interventions for samples with higher and lower percents of Latinos and Latin Americans: a meta-analysis of change in condom use and knowledge. *AIDS and Behavior* **12**(4): 521-543.
- Bateganya MH, Abdulwadud OA, Kiene SM. 2010. Home-based HIV voluntary counseling and testing in developing countries. *Cochrane Database of Systematic Reviews* (4): CD006493.
- Bauermeister JA, Tross S, Ehrhardt AA. 2009. A review of HIV/AIDS system-level interventions. *AIDS and Behavior* **13**(3): 430-448.
- Berg R. 2009. The effectiveness of behavioural and psychosocial HIV/STI prevention interventions for MSM in Europe: a systematic review. *Euro Surveill* **14**(48): 19430.
- Bertrand JT, O'Reilly K, Denison J, Anhang R, Sweat M. 2006. Systematic review of the effectiveness of mass communication programs to change HIV/AIDS-related behaviors in developing countries. *Health Education Research* **21**(4): 567-597.
- Bertrand JT, Anhang R. 2006. The effectiveness of mass media in changing HIV/AIDS-related behaviour among young people in developing countries. *World Health Organization Technical Report Series* **938**: 205-241.
- Blankenship KM, Bray SJ, Merson MH. 2000. Structural interventions in public health. *AIDS* **14**(Suppl.1): S11-S21.
- Brown JL, Venable PA. 2008. Cognitive-behavioral stress management interventions for persons living with HIV: a review and critique of the literature. *Annals of Behavioral Medicine* **35**(1): 26-40.
- Burton J, Darbes LA, Operario D. 2010. Couples-focused behavioral interventions for prevention of HIV: systematic review of the state of evidence. *AIDS and Behavior* **14**(1): 1-10.
- Coffin P. 2000. Syringe availability as HIV prevention: a review of modalities. *Journal of Urban Health* **77**(3): 306-330.
- Copenhaver MM, Johnson BT, Lee IC, Harman JJ, Carey MP, SHARP Research Team. 2006. Behavioral HIV risk reduction among people who inject drugs: meta-analytic evidence of efficacy. *Journal of Substance Abuse Treatment* **31**(2): 163-171.
- Crepaz N, Lyles CM, Wolitski RJ, Passin WF, Rama SM, Herbst JH, Purcell DW, Malow RM, Stall R, HIV/AIDS Prevention Research Synthesis (PRS) Team. 2006. Do prevention interventions reduce HIV risk behaviours among people living with HIV? A meta-analytic review of controlled trials. *AIDS* **20**(2): 143-157.

- Crepaz N, Horn AK, Rama SM, Griffin T, Deluca JB, Mullins MM, Aral SO, HIV/AIDS Prevention Research Synthesis Team. 2007. The efficacy of behavioral interventions in reducing HIV risk sex behaviors and incident sexually transmitted disease in black and Hispanic sexually transmitted disease clinic patients in the United States: a meta-analytic review. *Sexually Transmitted Diseases* **34**(6): 319-332.
- Crepaz N, Passin WF, Herbst JH, Rama SM, Malow RM, Purcell DW, Wolitski RJ, HIV/AIDS Prevention Research Synthesis Team. 2008. Meta-analysis of cognitive-behavioral interventions on HIV-positive persons' mental health and immune functioning. *Health Psychology* **27**(1): 4-14.
- Crepaz N, Marshall KJ, Aupont LW, Jacobs ED, Mizuno Y, Kay LS, Jones P, McCree DH, O'Leary A. 2009. The efficacy of HIV/STI behavioral interventions for African American females in the United States: a meta-analysis. *American Journal of Public Health* **99**(11): 2069-2078.
- Darbes L, Crepaz N, Lyles C, Kennedy G, Rutherford G. 2008. The efficacy of behavioral interventions in reducing HIV risk behaviors and incident sexually transmitted diseases in heterosexual African Americans. *AIDS* **22**(10): 1177-1194.
- Denison JA, O'Reilly KR, Schmid GP, Kennedy CE, Sweat MD. 2008. HIV voluntary counseling and testing and behavioral risk reduction in developing countries: a meta-analysis, 1990-2005. *AIDS and Behavior* **12**(3): 363-373.
- Diclemante RJ, Milhausen R, Sales JM, Salazar LF, Crosby RA. 2005. A programmatic and methodologic review and synthesis of clinic-based risk-reduction interventions for sexually transmitted infections: research and practice implications. *Seminars in Pediatric Infectious Diseases* **16**(3): 199-218.
- Durantini MR, Albarracin D, Mitchell AL, Earl AN, Gillette JC. 2006. Conceptualizing the influence of social agents of behavior change: a meta-analysis of the effectiveness of HIV-prevention interventionists for different groups. *Psychological Bulletin* **132**(2): 212-248.
- Earl A, Albarracin D. 2007. Nature, decay, and spiraling of the effects of fear-inducing arguments and HIV counseling and testing: a meta-analysis of the short- and long-term outcomes of HIV-prevention interventions. *Health Psychology* **26**(4): 496-506.
- Elwy AR, Hart GJ, Hawkes S, Petticrew M. 2002. Effectiveness of interventions to prevent sexually transmitted infections and human immunodeficiency virus in heterosexual men: a systematic review. *Archives of Internal Medicine* **162**(16): 1818-1830.
- Fisher JD, Smith LR, Lenz EM. 2010. Secondary prevention of HIV in the United States: past, current, and future perspectives. *Journal of Acquired Immune Deficiency Syndromes* **55**(Supplement 2): S106-S115.
- Foss AM, Hossain M, Vickerman PT, Watts CH. 2007. A systematic review of published evidence on intervention impact on condom use in sub-Saharan Africa and Asia. *Sexually Transmitted Infections* **83**(7): 510-516.

- Gallant M, Maticka-Tyndale E. 2004. School-based HIV prevention programmes for African youth. *Social Science & Medicine* **58**(7): 1337-1351.
- Herbst JH, Sherba RT, Crepaz N, Deluca JB, Zohrabyan L, Stall RD, Lyles CM, HIV/AIDS Prevention Research Synthesis Team. 2005. A meta-analytic review of HIV behavioral interventions for reducing sexual risk behavior of men who have sex with men. *Journal of Acquired Immune Deficiency Syndromes* **39**(2): 228-241.
- Herbst JH, Beeker C, Mathew A, McNally T, Passin WF, Kay LS, Crepaz N, Lyles CM, Briss P, Chattopadhyay S, Johnson RL. 2007. The effectiveness of individual-, group-, and community-level HIV behavioral risk-reduction interventions for adult men who have sex with men. A systematic review. *American Journal of Preventive Medicine* **32**(Supplement 4): 38-67.
- Herbst JH, Kay LS, Passin WF, Lyles CM, Crepaz N, Marin BV, HIV/AIDS Prevention Research Synthesis (PRS) Team. 2007. A systematic review and meta-analysis of behavioral interventions to reduce HIV risk behaviors of Hispanics in the United States and Puerto Rico. *AIDS and Behavior* **11**(1): 25-47.
- Hogben M, McNally T, McPheeters M, Hutchinson AB. 2007. The effectiveness of HIV partner counseling and referral services in increasing identification of HIV-positive individuals a systematic review. *American Journal of Preventive Medicine* **33**(2 Supplement1): S89-S100.
- Hong Y, Li X. 2009. HIV/AIDS behavioral interventions in china: a literature review and recommendation for future research. *AIDS and Behavior* **13**(3): 603-613.
- Huedo-Medina TB, Boynton MH, Warren MR, Lacroix JM, Carey MP, Johnson BT. 2010. Efficacy of HIV prevention interventions in Latin American and Caribbean nations, 1995-2008: a meta-analysis. *AIDS and Behavior* **14**(6): 1237-1251.
- Hutchinson AB, Branson BM, Kim A, Farnham PG. 2006. A meta-analysis of the effectiveness of alternative HIV counseling and testing methods to increase knowledge of HIV status. *AIDS* **20**(12): 1597-1604.
- Johnson-Masotti AP, Wienhardt LS, Pinkerton SD, Otto-Salaj LL. 2003. Efficacy and cost-effectiveness of the first generation of HIV prevention interventions for people with severe and persistent mental illness. *Journal of Mental Health Policy and Economics* **6**(1): 23-35.
- Johnson BT, Carey MP, Marsh KL, Levin KD, Scott-Sheldon LA. 2003. Interventions to reduce sexual risk for the human immunodeficiency virus in adolescents, 1985-2000: a research synthesis. *Archives of Pediatrics & Adolescent Medicine* **157**(4): 381-388.
- Johnson BT, Carey MP, Chaudoir SR, Reid AE. 2006. Sexual risk reduction for persons living with HIV: research synthesis of randomized controlled trials, 1993 to 2004. *Journal of Acquired Immune Deficiency Syndromes* **41**(5): 642-650.
- Johnson BT, Scott-Sheldon LA, Smoak ND, Lacroix JM, Anderson JR, Carey MP. 2009. Behavioral interventions for African Americans to reduce sexual risk of HIV: a meta-

- analysis of randomized controlled trials. *Journal of Acquired Immune Deficiency Syndromes* **51**(4): 492-501.
- Johnson WD, Hedges LV, Ramirez G, Semaan S, Norman LR, Sogolow E, Sweat MD, Diaz RM. 2002. HIV prevention research for men who have sex with men: a systematic review and meta-analysis. *Journal of Acquired Immune Deficiency Syndromes* **30**(Supplement 1): S118-S129.
- Johnson WD, Holtgrave DR, McClellan WM, Flanders WD, Hill AN, Goodman M. 2005. HIV intervention research for men who have sex with men: a 7-year update. *AIDS Education and Prevention* **17**(6): 568-589.
- Johnson WD, Diaz RM, Flanders WD, Goodman M, Hill AN, Holtgrave D, Malow R, McClellan WM. 2008. Behavioral interventions to reduce risk for sexual transmission of HIV among men who have sex with men. *Cochrane Database of Systematic Reviews* (3): CD001230.
- Kang M, Skinner R, Usherwood T. 2010. Interventions for young people in Australia to reduce HIV and sexually transmissible infections: a systematic review. *Sexual Health* **7**(2): 107-128.
- Kennedy CE, Medley AM, Sweat MD, O'Reilly KR. 2010. Behavioural interventions for HIV positive prevention in developing countries: a systematic review and meta-analysis. *Bulletin of the World Health Organization* **88**(8): 615-623.
- Kirby D, Obasi A, Laris BA. 2006. The effectiveness of sex education and HIV education interventions in schools in developing countries. *World Health Organization Technical Report Series* **938**: 103-150.
- Kirby DB, Laris BA, Roller LA. 2007. Sex and HIV education programs: their impact on sexual behaviors of young people throughout the world. *Journal of Adolescent Health* **40**(3): 206-217.
- Ksobiech K. 2003. Risky sexual behaviors and HIV/disease knowledge of injection drug users attending needle exchange programs: a call for additional interventions. *Journal of HIV/AIDS & Social Services* **2**(2): 41-63.
- Lazarus JV, Sihvonen-Riemenschneider H, Laukamm-Josten U, Wong F, Liljestrang J. 2010. Systematic review of interventions to prevent the spread of sexually transmitted infections, including HIV, among young people in Europe. *Croatian Medical Journal* **51**(1): 74-84.
- Lichtenstein B, Malow R. 2010. A critical review of HIV-related interventions for women prisoners in the United States. *Journal of the Association of Nurses in AIDS Care* **21**(5): 380-394.
- Lin JS, Whitlock E, O'Connor E, Bauer V. 2008. Behavioral counseling to prevent sexually transmitted infections: a systematic review for the U.S. Preventive Services Task Force. *Annals of Internal Medicine* **149**(7): 497-508.

- Logan TK, Cole J, Leukefeld C. 2002. Women, sex, and HIV: social and contextual factors, meta-analysis of published interventions, and implications for practice and research. *Psychological Bulletin* **128**(6): 851-885.
- Lyles CM, Kay LS, Crepaz N, Herbst JH, Passin WF, Kim AS, Rama SM, Thadiparthi S, Deluca JB, Mullins MM, HIV/AIDS Prevention Research Synthesis Team. 2007. Best-evidence interventions: findings from a systematic review of HIV behavioral interventions for US populations at high risk, 2000-2004. *American Journal of Public Health* **97**(1): 133-143.
- Magnussen L, Ehiri JE, Ejere HO, Jolly PE. 2004. Interventions to prevent HIV/AIDS among adolescents in less developed countries: are they effective? *International Journal of Adolescent Medicine* **16**: 303-323.
- Manhart LE, Holmes KK. 2005. Randomized controlled trials of individual-level, population-level, and multilevel interventions for preventing sexually transmitted infections: what has worked? *Journal of Infectious Diseases* **191**(Supplement 1): S7-S24.
- Maticka-Tyndale E, Brouillard-Coylea C. 2006. The effectiveness of community interventions targeting HIV and AIDS prevention at young people in developing countries. *World Health Organization Technical Report Series* **938**: 243-285.
- McCoy SI, Kangwende RA, Padian NS. 2010. Behavior change interventions to prevent HIV infection among women living in low and middle income countries: a systematic review. *AIDS and Behavior* **14**(3): 469-482.
- McKay A. 2000. Prevention of sexually transmitted infections in different populations: a review of behaviourally effective and cost-effective interventions. *Canadian Journal of Human Sexuality* **9**(2): 95-120.
- Meader N, Li R, Des J, Pilling S. 2010. Psychosocial interventions for reducing injection and sexual risk behaviour for preventing HIV in drug users. *Cochrane Database of Systematic Reviews* (1): CD007192.
- Medley A, Kennedy C, O'Reilly K, Sweat M. 2009. Effectiveness of peer education interventions for HIV prevention in developing countries: a systematic review and meta-analysis. *AIDS Education and Prevention* **21**(3): 181-206.
- Merson MH, Dayton JM, O'Reilly K. 2000. Effectiveness of HIV prevention interventions in developing countries. *AIDS* **14**(Supplement 2): S68-S84.
- Merzel C, D'Afflitti J. 2003. Reconsidering community-based health promotion: promise, performance, and potential. *American Journal of Public Health* **93**(4): 557-574.
- Michielsen K, Chersich MF, Luchters S, De KP, Van RR, Temmerman M. 2010. Effectiveness of HIV prevention for youth in sub-Saharan Africa: systematic review and meta-analysis of randomized and nonrandomized trials. *AIDS* **24**(8): 1193-1202.
- Mize SJ, Robinson BE, Bockting WO, Scheltema KE. 2002. Meta-analysis of the effectiveness of HIV prevention interventions for women. *AIDS Care* **14**(2): 163-180.

- Morrison-Beedy D, Nelson LE. 2004. HIV prevention interventions in adolescent girls: what is the state of the science? *Worldviews on Evidence-Based Nursing* **1**(3): 165-175.
- Mullen PD, Ramirez G, Strouse D, Hedges LV, Sogolow E. 2002. Meta-analysis of the effects of behavioral HIV prevention interventions on the sexual risk behavior of sexually experienced adolescents in controlled studies in the United States. *Journal of Acquired Immune Deficiency Syndromes* **30**(Supplement 1): S94-S105.
- Neumann MS, Johnson WD, Semaan S, Flores SA, Peersman G, Hedges LV, Sogolow E. 2002. Review and meta-analysis of HIV prevention intervention research for heterosexual adult populations in the United States. *Journal of Acquired Immune Deficiency Syndromes* **30**(Supplement 1): S106-S117.
- Noar SM, Carlyle K, Cole C. 2006. Why communication is crucial: meta-analysis of the relationship between safer sexual communication and condom use. *Journal of Health Communication* **11**(4): 365-390.
- Noar SM. 2008. Behavioral interventions to reduce HIV-related sexual risk behavior: review and synthesis of meta-analytic evidence. *AIDS and Behavior* **12**(3): 335-353.
- Noar SM, Black HG, Pierce LB. 2009. Efficacy of computer technology-based HIV prevention interventions: a meta-analysis. *AIDS* **23**(1): 107-115.
- Noar SM, Palmgreen P, Chabot M, Dobransky N, Zimmerman RS. 2009. A 10-year systematic review of HIV/AIDS mass communication campaigns: Have we made progress? *Journal of Health Communication* **14**(1): 15-42.
- Padian NS, McCoy SI, Balkus JE, Wasserheit JN. 2010. Weighing the gold in the gold standard: challenges in HIV prevention research. *AIDS* **24**(5): 621-635.
- Paul-Ebhohimhen VA, Poobalan A, van Teijlingen ER. 2008. A systematic review of school-based sexual health interventions to prevent STI/HIV in sub-Saharan Africa. *BMC Public Health* **8**: 4.1-4.13.
- Pedlow CT, Carey MP. 2003. HIV sexual risk-reduction interventions for youth: a review and methodological critique of randomized controlled trials. *Behavior Modification* **27**(2): 135-190.
- Prendergast ML, Urada D, Podus D. 2001. Meta-analysis of HIV risk-reduction interventions within drug abuse treatment programs. *Journal of Consulting & Clinical Psychology* **69**(3): 389-405.
- Rees, R., Kavanagh, J., Burchett, H., Shepherd, J., Brunton, G., Harden, A., Thomas, J., Oliver, S., Oakley, A. 2004. HIV health promotion and men who have sex with men (MSM): a systematic review of research relevant to the development and implementation of effective and appropriate interventions. Eppi Centre, London.
- Robin L, Dittus P, Whitaker D, Crosby R, Ethier K, Mezoff J, Miller K, Pappas-Deluca K. 2004. Behavioral interventions to reduce incidence of HIV, STD, and pregnancy among adolescents: a decade in review. *Journal of Adolescent Health* **34**(1): 3-26.

- Rotheram-Borus MJ, Cantwell S, Newman PA. 2000. HIV prevention programs with heterosexuals. *AIDS* **14**(Supplement 2): S59-S67.
- Russak SM, Ortiz DJ, Galvan FH, Bing EG. 2005. Protecting our militaries: a systematic literature review of military human immunodeficiency virus/acquired immunodeficiency syndrome prevention programs worldwide. *Military Medicine* **170**(10): 886-897.
- Sales JM, Milhausen RR, Diclemente RJ. 2006. A decade in review: building on the experiences of past adolescent STI/HIV interventions to optimise future prevention efforts. *Sexually Transmitted Infections* **82**(6): 431-436.
- Sangani P, Rutherford G, Wilkinson D. 2004. Population-based interventions for reducing sexually transmitted infections, including HIV infection. *Cochrane Database of Systematic Reviews* (2): CD001220.
- Scott-Sheldon LA, Johnson BT. 2006. Eroticizing creates safer sex: a research synthesis. *Journal of Primary Prevention* **27**(6): 619-640.
- Scott-Sheldon LA, Fielder RL, Carey MP. 2010. Sexual risk reduction interventions for patients attending sexually transmitted disease clinics in the United States: a meta-analytic review, 1986 to early 2009. *Annals of Behavioral Medicine* **40**(2): 191-204.
- Semaan S, Des J, Sogolow E, Johnson WD, Hedges LV, Ramirez G, Flores SA, Norman L, Sweat MD, Needle R. 2002. A meta-analysis of the effect of HIV prevention interventions on the sex behaviors of drug users in the United States. *Journal of Acquired Immune Deficiency Syndromes* **30**(Supplement 1): S73-S93.
- Shahmanesh M, Patel V, Mabey D, Cowan F. 2008. Effectiveness of interventions for the prevention of HIV and other sexually transmitted infections in female sex workers in resource poor setting: a systematic review. *Tropical Medicine & International Health* **13**(5): 659-679.
- Shepherd J, Kavanagh J, Picot J, Cooper K, Harden A, Barnett-Page E, Jones J, Clegg A, Hartwell D, Frampton GK, Price A. 2010. The effectiveness and cost-effectiveness of behavioural interventions for the prevention of sexually transmitted infections in young people aged 13-19: a systematic review and economic evaluation. *Health Technology Assessment* **14**(7): 1-206.
- Silveira MF, dos S, I. 2005. Impact of interventions promoting condom use among HIV-infected individuals. *Revista de Saude Publica* **39**(2): 296-304.
- Smoak ND, Scott-Sheldon LA, Johnson BT, Carey MP. 2006. Sexual risk reduction interventions do not inadvertently increase the overall frequency of sexual behavior: a meta-analysis of 174 studies with 116,735 participants. *Journal of Acquired Immune Deficiency Syndromes* **41**(3): 374-384.
- Sorensen JL, Copeland AL. 2000. Drug abuse treatment as an HIV prevention strategy: a review. *Drug and Alcohol Dependence* **59**(1): 17-31.
- Sorsdahl K, Ipser JC, Stein DJ. 2009. Interventions for educating traditional healers about STD and HIV medicine. *Cochrane Database of Systematic Reviews* (4): CD007190.

- Speizer IS, Colvin CE. 2003. The effectiveness of adolescent reproductive health interventions in developing countries: a review of the evidence. *Journal of Adolescent Health* **33**(5): 324-348.
- Sternberg P, Hubley J. 2004. Evaluating men's involvement as a strategy in sexual and reproductive health promotion. *Health Promotion International* **19**(3): 389-396.
- Tolou-Shams M, Stewart A, Fasciano J, Brown LK. 2010. A review of HIV prevention interventions for juvenile offenders. *Journal of Pediatric Psychology* **35**(3): 250-261.
- Trelle S, Shang A, Nartey L, Cassell JA, Low N. 2007. Improved effectiveness of partner notification for patients with sexually transmitted infections: systematic review. *BMJ British Medical Journal* **334**(7589): 354.
- Underhill K, Montgomery P, Operario D. 2007. Sexual abstinence only programmes to prevent HIV infection in high income countries: systematic review. *BMJ British Medical Journal* **335**(7613): 248.
- Underhill K, Operario D, Montgomery P. 2007. Systematic review of abstinence-plus HIV prevention programs in high-income countries. *PLoS Medicine* **4**(9): e275.
- Underhill K, Operario D, Montgomery P. 2007. Abstinence-only programs for HIV infection prevention in high-income countries. *Cochrane Database of Systematic Reviews* (4): CD005421.
- Underhill K, Montgomery P, Operario D. 2008. Abstinence-plus programs for HIV infection prevention in high-income countries. *Cochrane Database of Systematic Reviews* (1): CD007006.
- Van Empelen P, Kok G, Van Kesteren NMC, Van Den BB, Bos AER, Schaalma HP. 2003. Effective methods to change sex-risk among drug users: a review of psychosocial interventions. *Social Science and Medicine* **57**(9): 1593-1608.
- Vergidis PI, Falagas ME. 2009. Meta-analyses on behavioral interventions to reduce the risk of transmission of HIV. *Infectious Disease Clinics of North America* **23**(2): 309-314.
- Vidanapathirana J, Abramson MJ, Forbes A, Fairley C. 2005. Mass media interventions for promoting HIV testing. *Cochrane Database of Systematic Reviews* (3): CD004775.
- Vijayakumar G, Mabude Z, Smit J, Beksinska M, Lurie M. 2006. A review of female-condom effectiveness: patterns of use and impact on protected sex acts and STI incidence. *International Journal of STD & AIDS* **17**(10): 652-659.
- Ward DJ, Rowe B, Pattison H, Taylor RS, Radcliffe KW. 2005. Reducing the risk of sexually transmitted infections in genitourinary medicine clinic patients: a systematic review and meta-analysis of behavioural interventions. *Sexually Transmitted Infections* **81**(5): 386-393.
- Wilkinson D, Rutherford G. 2001. Population-based interventions for reducing sexually transmitted infections, including HIV infection. *Cochrane Database of Systematic Reviews* (2): CD001220.



Wodak A, Cooney A. 2005. Effectiveness of sterile needle and syringe programmes.  
*International Journal of Drug Policy* **16**(Supplement 1): S31-S44.

Wright NM, Walker J. 2006. Homelessness and drug use -- a narrative systematic review of interventions to promote sexual health. *AIDS Care* **18**(5): 467-478.
